# Supplementary material for: Optimization shallow groundwater quality by the application of photocatalysis treatment technique in El Obour city, Egypt
Source: Copernicus journal article supplement (doi:10.5194/dwes-2018-41), 2018-12-20
Supplement: Supplementary file [file dwes-2018-41-AC2-supplement.pdf]

## Reply to Review report

Dear Kamel Mahfouz

We are sending the deepest appreciation and respect for your kind care and attention. Great thanks for your important comments:

Page one:

Abstract, Line No(14) change The heavy metal to The heavy metals.

Done

Page four:

Line no. 13 Are  $\text{TiO}_2$  or N- $\text{TiO}_2$

N- $\text{TiO}_2$

Page five:

Line number 24 and 27 superscript ( $\text{TiO}_2$ )

Done

Conclusion:

Change line no 6 to (Photocatalytic treatment of polluted water using N-doped nano-titania).

Done

Recommendations:

Change the last paragraph to:

- Photocatalytic treatment shows excellent ability towards the removal of microbial pollutants as well as organic residuals in safe and inexpensive ways.

Done

References:

Could reduce the references

Done

Page sixteen:

Duplication of the figure caption

The first caption was removed
