# Supplementary material for: Optimization shallow groundwater quality by the application of photocatalysis treatment technique in El Obour city, Egypt
Source: Copernicus journal article supplement (doi:10.5194/dwes-2018-41), 2018-12-20
Supplement: Supplementary file [file dwes-2018-41-SC1-supplement.pdf]

# Review report

**For the paper entitled "Optimization shallow groundwater quality by the application of photocatalysis treatment technique in El Obour city, Egypt"**

**Manuscript Ref. dwes-2018-41**

In general, the paper is above average with important scientific merit. The paper has been written in an easily readable and understandable manner. It is well designed and structured. The experimental techniques used and the experiments are appropriate. In my opinion:

- The topic of the article is suitable for publication in **Drinking Water Engineering and Science Journal**
- The article is original with new important results.
- The article is well organized and clearly written.
- The abstract is appropriate.

For Authors

You have prepared your manuscript carefully and precisely and have put a lot of effort into output.

**I recommend accepting the manuscript for publishing after the following minor corrections:**

Page one:

Abstract, Line No(14) change The heavy metal to The heavy metals

Page four:

Line no. 13 Are  $\text{TiO}_2$  or N- $\text{TiO}_2$

Page five:

Line number 24 and 27 superscript ( $\text{TiO}_2$ )

Conclusion:

Change line no 6 to (Photocatalytic treatment of polluted water using N-doped nano-titania).

Recommendations:

Change the last paragraph to:

- Photocatalytic treatment shows excellent ability towards the removal of microbial pollutants as well as organic residuals in safe and inexpensive ways.

References:

Could reduce the references

Page sixteen:

Duplication of the figure caption
